# Supplementary material for: Microsecond pulsed hydrogen/deuterium exchange of electrosprayed ubiquitin ions stored in a linear ion trap
Source: Royal Society of Chemistry journal article supplement (doi:10.1039/c4cp04716h), 2014-12-16

# Microsecond Pulsed Hydrogen/Deuterium Exchange of Electrosprayed Ubiquitin Ions Stored in a Linear Ion Trap

Khadijeh Rajabi\*

Department of Chemistry, University of British Columbia (UBC), 2036 Mail Mall, Vancouver,  
BC V6T 1Z1 Canada<sup>1</sup>

\* *Correspondence to:* Khadijeh Rajabi; e-mail: [k.n.rajabi@leeds.ac.uk](mailto:k.n.rajabi@leeds.ac.uk)

---

<sup>1</sup> Current address: Astbury Center for Structural Molecular Biology (ACSMB), University of Leeds, Leeds LS2 9JT  
UK

Figure S1.

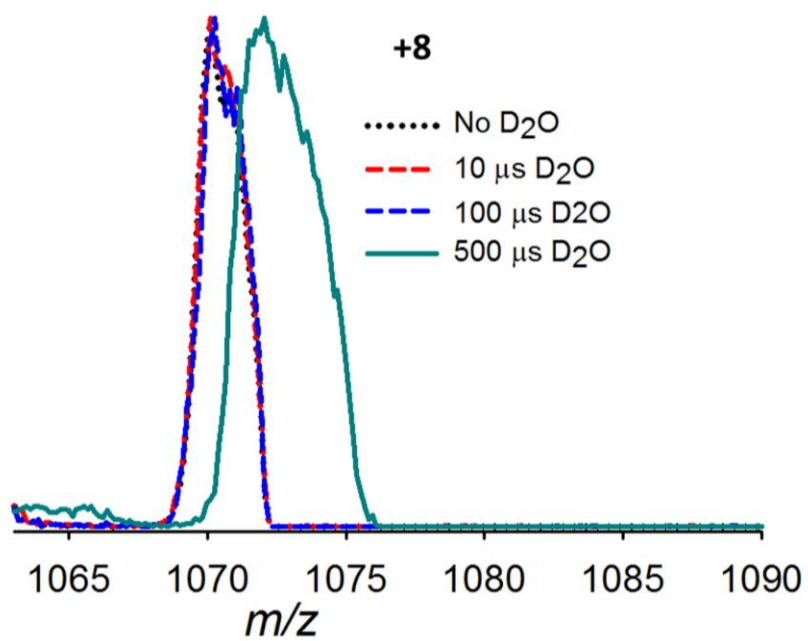

Supplement: c4cp04716h1.pdf [file c4cp04716h1.pdf]
